# Supplementary material for: Validity and Reliability of a Japanese Version of the Oldenburg Burnout Inventory–Medical Student: A Study on Students in Clinical Clerkships
Source: Research Square preprint supplement (doi:10.21203/rs.3.rs-7717852/v1), 2025-10-22
Supplement: Supplementary file 1 [file 1b7b4aaed20bf9c2211b3601.docx]

Table S2. Japanese OLBI-MS (11 items): item texts and response options (English translation)

Please indicate to what extent you agree with each of the following statements by selecting the number that corresponds with the statement.

|  | Strongly Agree | Agree | Disagree | Strongly Disagree |
| --- | --- | --- | --- | --- |
| 1. I always find new and interesting aspects in clinical practice (training) at the medical school. | 1 | 2 | 3 | 4 |
| 1. There are days when I feel tired even before I arrive at the university (medical school) or hospital. | 1 | 2 | 3 | 4 |
| 1. I more often talk negatively about clinical practice (training) at the medical school. | 1 | 2 | 3 | 4 |
| 1. Recently, I tend to take more time to relax and feel good after a clinical practice (training) at the medical school. | 1 | 2 | 3 | 4 |
| 1. Recently, I tend to do the clinical practice (training) in the medical school almost mechanically without thinking deeply. | 1 | 2 | 3 | 4 |
| 1. I think clinical practice (training) at the medical school is a positive challenge. | 1 | 2 | 3 | 4 |
| 1. During clinical practice (training) at the medical school, I often feel mentally exhausted. | 1 | 2 | 3 | 4 |
| 1. Even after spending the day in clinical practice (training) at the medical school, I still have enough energy for leisure activities. | 1 | 2 | 3 | 4 |
| 1. I get fed up with clinical practice (training) at the medical school sometimes. | 1 | 2 | 3 | 4 |
| 1. I usually feel worn out after the clinical practice (training) at the medical school. | 1 | 2 | 3 | 4 |
| 1. I feel that I am becoming more engaged in the clinical practice(training) at the medical school. | 1 | 2 | 3 | 4 |

Disengagement： 1, 3(R), 5(R), 6, 9(R), 11

Exhaustion ： 2(R), 4(R), 7(R), 8, 10(R)

Note. R indicates a reverse-scored (reverse-coded) item; subscale scores are computed by simple summation after reversing the R items.
